# Supplementary material for: Downscaling future climate scenarios to fine scales for hydrologic and ecological modeling and analysis
Source: Springer Nature journal article supplement (doi:10.1186/2192-1709-1-2), 2012-02-10

0 25 50 100 Kilometers

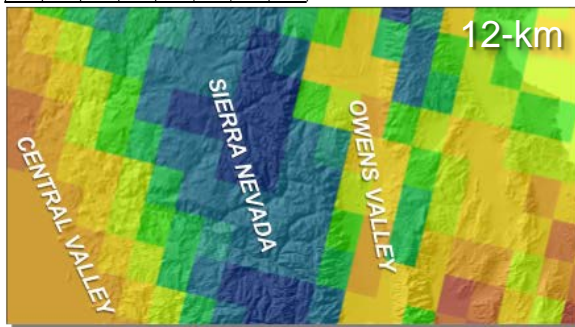

Processing sequence:

(1) 2 degree monthly GCM output → 12-km grids using constructed analogues.

(2) 12-km monthly grids (1950-2000 and 2000-2100) → 4-km grids using GIDS.

(3) Bias-correction coefficients are determined using monthly downscaled GCM 4-km grids and historical PRISM data for 1950-2000.

(4) Bias corrections are made on monthly grids using the coefficients. Ratios of corrected to uncorrected data are calculated.

(5) Monthly 4-km bias-corrected grids → 270-m grids using GIDS.

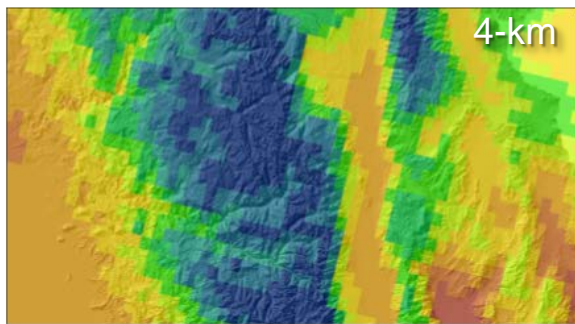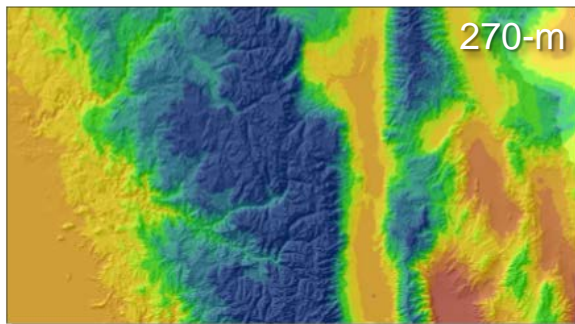

**Maximum  
Air  
Temperature  
(C)**

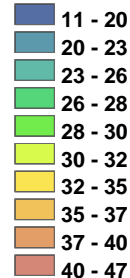

Supplement: 13717_2011_2_MOESM1_ESM.pdf [file 13717_2011_2_MOESM1_ESM.pdf]
