# Supplementary material for: Downscaling future climate scenarios to fine scales for hydrologic and ecological modeling and analysis
Source: Springer Nature journal article supplement (doi:10.1186/2192-1709-1-2), 2012-02-10

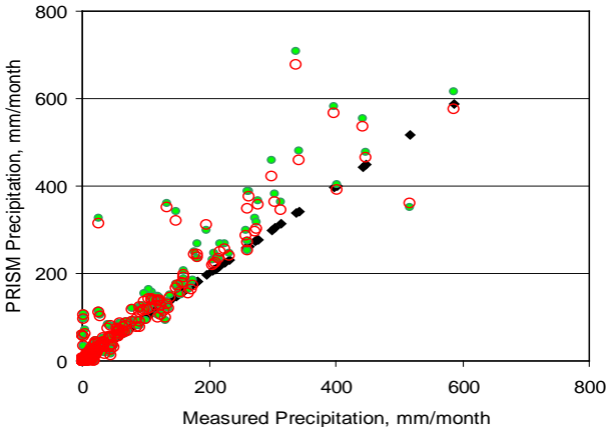

◆ CIMIS measured data ● PRISM 4 km ○ PRISM Downscaled to 270 m

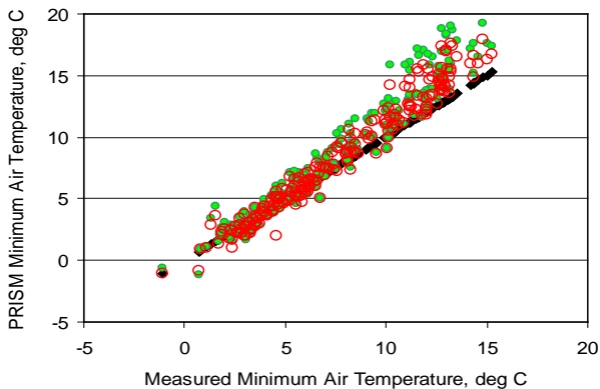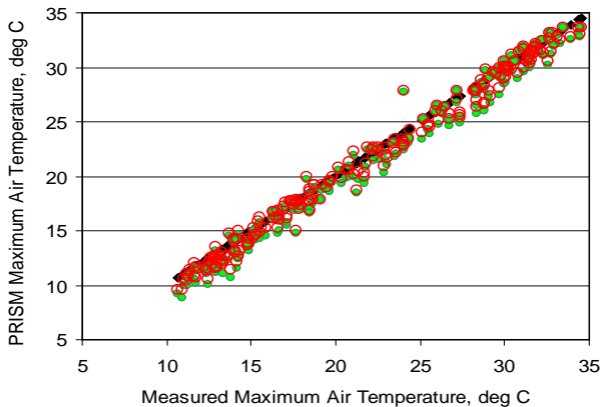

Supplement: 13717_2011_2_MOESM3_ESM.pdf [file 13717_2011_2_MOESM3_ESM.pdf]
