# Supplementary material for: Downscaling future climate scenarios to fine scales for hydrologic and ecological modeling and analysis
Source: Springer Nature journal article supplement (doi:10.1186/2192-1709-1-2), 2012-02-10
Supplement: 13717_2011_2_MOESM5_ESM.pdf [file 13717_2011_2_MOESM5_ESM.pdf]

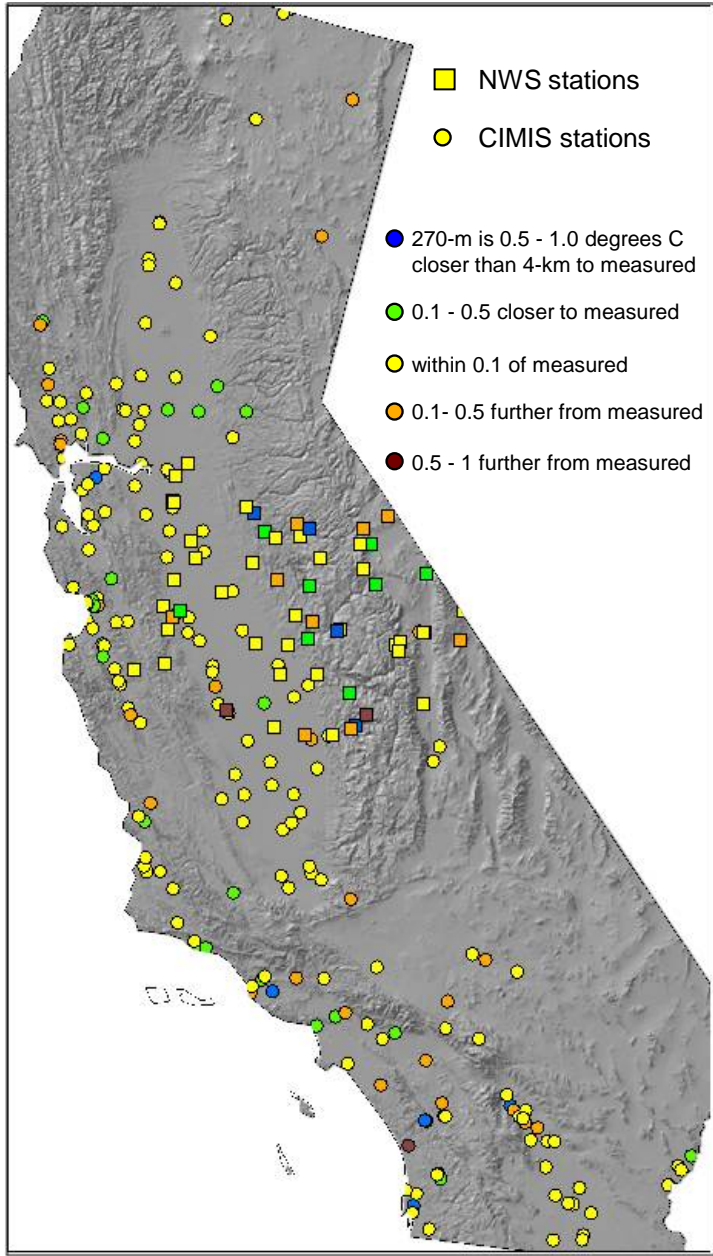

Figure 1. Station locations and error categories for the 270-m model in California.
