# Supplementary material for: Downscaling future climate scenarios to fine scales for hydrologic and ecological modeling and analysis
Source: Springer Nature journal article supplement (doi:10.1186/2192-1709-1-2), 2012-02-10

## Redwood Forest

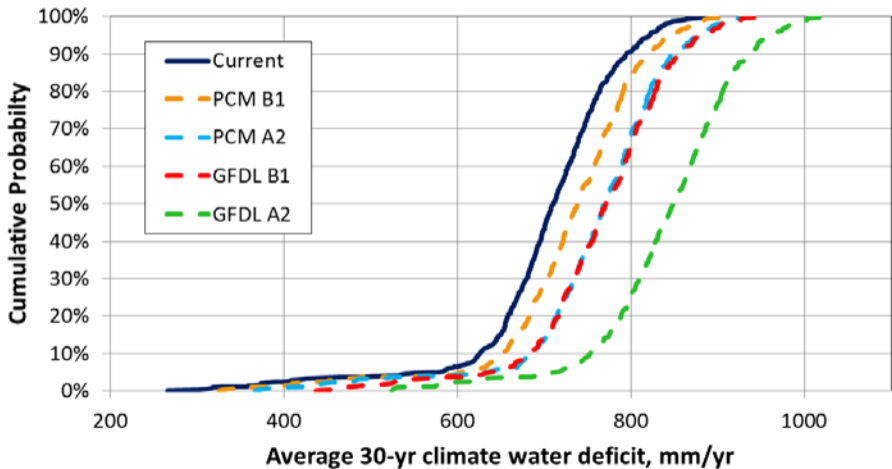

Supplement: 13717_2011_2_MOESM7_ESM.pdf [file 13717_2011_2_MOESM7_ESM.pdf]
